# Supplementary material
Source: publisher figshare collection journal article supplement (https://sage.figshare.com/ndownloader/files/13644284)
Supplement: Supplementary file 1 [file 13644284]

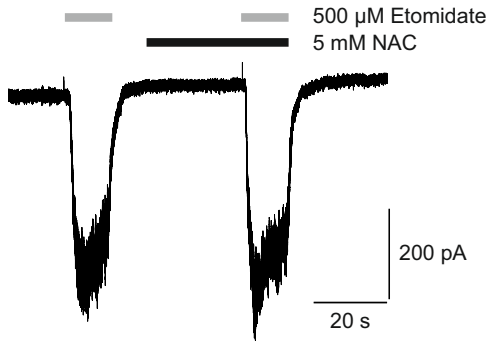

**Supplemental Material Figure 2: Activation of hTRPA1 by etomidate is independent of N-acetyl-L-cysteine (NAC).**

Representative inward current trace of hTRPA1 transiently expressed in HEK293t cells evoked by 500  $\mu$ M etomidate alone and after pretreatment with the electrophile scavenger 5 mM N-acetyl-L-cysteine (n=6).
